# Supplementary material
Source: ML conference proceedings conference paper supplement (https://www.ecva.net/papers/eccv_2020/papers_ECCV/html/123510732_ECCV_2020_paper.php)
Supplement: Supplementary file 3 [file 123510732-supp.zip]

Archive with 14 entries (14 files):
- 0088-supp.pdf
- __MACOSX/._0088-supp.pdf
- video1.mp4
- __MACOSX/._video1.mp4
- video2.mp4
- __MACOSX/._video2.mp4
- video3.mp4
- __MACOSX/._video3.mp4
- video4.mp4
- __MACOSX/._video4.mp4
- video5.mp4
- __MACOSX/._video5.mp4
- video6.mp4
- __MACOSX/._video6.mp4
